# Supplementary material for: Postprandial increase in serum CA125 as a surrogate biomarker for early diagnosis of ovarian cancer
Source: Springer Nature journal article supplement (doi:10.1186/s12967-018-1489-4), 2018-05-01
Supplement: MOESM1 [file 15731168]

## Additional File 1

**Table S1.** Demographic, clinical and pathological characteristics of the study population.

| Characteristics         | Pelvic inflammatory cyst<br>(n=55) | Adnexal retention cyst<br>(n=65) | Ovarian endometrioma<br>(n=348) | Ovarian benign/borderline<br>cystadenoma<br>(n=47) | Ovarian cancer<br>(n=36) | p value |
|-------------------------|------------------------------------|----------------------------------|---------------------------------|----------------------------------------------------|--------------------------|---------|
| Age (years)*            | 36.1 ± 6.9                         | 52.6 ± 12.8                      | 36.9 ± 6.9                      | 40.7 ± 11.5                                        | 54.3 ± 6.9               | < 0.001 |
| Gravity*                | 1.1 ± 1.2                          | 2.2 ± 1.1                        | 1.4 ± 1.0                       | 1.7 ± 1.1                                          | 2.0 ± 0.9                | < 0.001 |
| Parity*                 | 0.4 ± 0.6                          | 1.2 ± 0.6                        | 0.7 ± 0.6                       | 0.8 ± 0.5                                          | 1.0 ± 0.4                | < 0.001 |
| Cyst size (mm)**        | 4.3 ± 0.5                          | 4.4 ± 0.4                        | 4.2 ± 0.5                       | 4.3 ± 0.4                                          | 4.3 ± 0.5                | 0.065   |
| Ascites                 |                                    |                                  |                                 |                                                    |                          | -       |
| Yes                     | -                                  | -                                | -                               | 0                                                  | 0                        |         |
| No                      | -                                  | -                                | -                               | 47                                                 | 36                       |         |
| Peritoneal metastasis   |                                    |                                  |                                 |                                                    |                          | -       |
| Yes                     | -                                  | -                                | -                               | 0                                                  | 0                        |         |
| No                      | -                                  | -                                | -                               | 47                                                 | 36                       |         |
| Lymphatic metastasis    |                                    |                                  |                                 |                                                    |                          | -       |
| Yes                     | -                                  | -                                | -                               | 0                                                  | 0                        |         |
| No                      | -                                  | -                                | -                               | 47                                                 | 36                       |         |
| Stage <sup>†</sup>      |                                    |                                  |                                 |                                                    |                          | -       |
| I                       | -                                  | -                                | -                               | 1                                                  | 23                       |         |
| II                      | -                                  | -                                | -                               | 0                                                  | 13                       |         |
| III                     | -                                  | -                                | -                               | 0                                                  | 0                        |         |
| IV                      | -                                  | -                                | -                               | 0                                                  | 0                        |         |
| Histotypes <sup>‡</sup> |                                    |                                  |                                 |                                                    |                          | 0.032   |
| Serous                  | -                                  | -                                | -                               | 44                                                 | 29                       |         |
| Mucinous                | -                                  | -                                | -                               | 3                                                  | 1                        |         |
| Endometrioid            | -                                  | -                                | -                               | 0                                                  | 4                        |         |

|            |   |   |   |   |    |   |
|------------|---|---|---|---|----|---|
| Clear cell | - | - | - | 0 | 2  |   |
| Grade      |   |   |   |   |    | - |
| G1         | - | - | - | - | 9  |   |
| G2         | - | - | - | - | 12 |   |
| G3         | - | - | - | - | 15 |   |

\* Data are presented as the mean  $\pm$  standard deviation, ANOVA.

\*\* Measured as the maximal diameter of the cyst.

† FIGO 2000 (for borderline cystadenoma and ovarian cancer only).

‡ Only patients with ovarian benign/borderline cystadenoma and patients with ovarian cancer were compared, two-sided  $\chi^2$  test.

**Table S2.** Serum CA125 levels (random) detected in the study population.

| Disease types                 | Patient number | Median (U/mL) | Mean (U/mL) | Standard deviation (U/mL) |
|-------------------------------|----------------|---------------|-------------|---------------------------|
| Pelvic inflammatory cyst      | 55             | 35.5          | 109.2       | 170.2                     |
| Adnexal retention cyst        | 65             | 15.2          | 23.3        | 26.0                      |
| Simple cyst                   | 38             | 14.3          | 21.7        | 18.6                      |
| Mesonephric cyst              | 27             | 15.2          | 25.4        | 34.1                      |
| Endometriotic cyst            | 348            | 87.5          | 103.1       | 60.1                      |
| Benign/borderline cyst        | 47             | 105.5         | 120.1       | 91.6                      |
| Serous cystadenoma            | 42             | 102.3         | 115.9       | 91.6                      |
| Mucinous cystadenoma          | 3              | 81.5          | 104.8       | 88.8                      |
| Borderline serous cystadenoma | 2              | 231.3         | 231.3       | 25.1                      |
| Ovarian cancer                | 36             | 94.6          | 127.1       | 113.4                     |
| Serous                        | 29             | 88.1          | 124.1       | 118.2                     |
| Stage I                       | 19             | 88.1          | 123.2       | 109.2                     |
| Stage II                      | 10             | 87.3          | 125.8       | 139.9                     |
| Mucinous                      | 1              | 312.5         | 312.5       | -                         |
| Stage II                      | 1              | 312.5         | 312.5       | -                         |
| Endometrioid                  | 4              | 72.6          | 102.0       | 82.8                      |
| Stage I                       | 3              | 56.0          | 61.8        | 24.8                      |
| Stage II                      | 1              | 222.5         | 222.5       | -                         |
| Clear cell                    | 2              | 128.1         | 128.1       | 32.5                      |
| Stage I                       | 1              | 105.1         | 105.1       | -                         |
| Stage II                      | 1              | 151.1         | 151.1       | -                         |
| Stage I                       | 23             | 88.5          | 114.5       | 101.3                     |
| Stage II                      | 13             | 110.6         | 149.5       | 133.5                     |

**Table S3.** Comparisons of the differences in CA125 serum levels (random) among the five disease groups.\*

|                                             | Pelvic<br>inflammatory cyst | Adnexal<br>retention cyst | Ovarian<br>endometrioma | Ovarian<br>benign/borderline<br>cystadenoma | Ovarian cancer |
|---------------------------------------------|-----------------------------|---------------------------|-------------------------|---------------------------------------------|----------------|
| Pelvic<br>inflammatory cyst                 | -                           | <0.001                    | 0.788                   | 0.699                                       | 0.582          |
| Adnexal<br>retention cyst                   | -                           | -                         | <0.001                  | <0.001                                      | <0.001         |
| Ovarian<br>endometrioma                     | -                           | -                         | -                       | 0.222                                       | 0.217          |
| Ovarian<br>benign/borderline<br>cystadenoma | -                           | -                         | -                       | -                                           | 0.754          |
| Ovarian cancer                              | -                           | -                         | -                       | -                                           | -              |

\* For each pair of disease groups, a p value for the difference of their CA125 serum levels (random) was given. Two-sided Student's t test (for independent samples) was used.

**Table S4.** Comparisons of the differences between fasting and postprandial CA125 serum levels for the five disease groups.

| Groups                                | Fasting CA125 (U/mL) <sup>†</sup> | Postprandial CA125 (U/mL) <sup>†</sup> | CA125 increment (%) <sup>†‡</sup> | <i>p</i> value |
|---------------------------------------|-----------------------------------|----------------------------------------|-----------------------------------|----------------|
| Pelvic inflammatory cyst              | 110.9 ± 181.1                     | 107.3 ± 159.8                          | 1.3 ± 7.0                         | 0.322          |
| Adnexal retention cyst                | 22.8 ± 25.2                       | 23.6 ± 26.8                            | 2.7 ± 8.1                         | 0.007          |
| Ovarian endometrioma                  | 100.9 ± 58.8                      | 104.3 ± 60.9                           | 3.2 ± 6.4                         | < 0.001        |
| Ovarian benign/borderline cystadenoma | 119.7 ± 93.5                      | 120.4 ± 90.7                           | 3.4 ± 9.3                         | 0.808          |
| Ovarian cancer                        | 118.4 ± 108.9                     | 131.6 ± 118.0                          | 13.3 ± 6.9                        | < 0.001        |

<sup>†</sup> Data are presented as the mean ± standard deviation, paired-samples Student's t test (two-sided).

<sup>‡</sup> For each patient, the CA125 increment = (fasting CA125 – postprandial CA125) / fasting CA125 × 100%.

**Table S5.** Coordinates of the ROC curve for fasting CA125 levels (calculated by SPSS 18.0).

| Positive if greater than or equal to the<br>CA125 level (U/mL) | Sensitivity | 1 - Specificity |
|----------------------------------------------------------------|-------------|-----------------|
| 3.130                                                          | 1.000       | 1.000           |
| 4.765                                                          | 1.000       | .998            |
| 5.570                                                          | 1.000       | .996            |
| 6.420                                                          | 1.000       | .994            |
| 7.200                                                          | 1.000       | .992            |
| 7.350                                                          | 1.000       | .990            |
| 7.420                                                          | 1.000       | .988            |
| 7.470                                                          | 1.000       | .986            |
| 7.750                                                          | 1.000       | .984            |
| 8.065                                                          | .972        | .983            |
| 8.215                                                          | .972        | .981            |
| 8.330                                                          | .972        | .977            |
| 8.825                                                          | .972        | .975            |
| 9.295                                                          | .972        | .973            |
| 9.350                                                          | .972        | .969            |
| 9.450                                                          | .972        | .967            |
| 9.850                                                          | .972        | .965            |
| 10.250                                                         | .972        | .963            |
| 10.350                                                         | .972        | .959            |
| 10.600                                                         | .972        | .957            |
| 10.950                                                         | .972        | .955            |
| 11.200                                                         | .972        | .953            |
| 11.350                                                         | .972        | .946            |
| 11.450                                                         | .972        | .944            |
| 11.950                                                         | .972        | .942            |
| 12.450                                                         | .972        | .938            |
| 12.650                                                         | .972        | .936            |
| 12.800                                                         | .972        | .934            |
| 12.890                                                         | .972        | .930            |
| 12.990                                                         | .972        | .928            |
| 13.030                                                         | .944        | .926            |
| 13.270                                                         | .944        | .924            |
| 13.840                                                         | .944        | .922            |
| 14.220                                                         | .944        | .915            |
| 14.320                                                         | .944        | .913            |
| 14.750                                                         | .944        | .911            |
| 15.250                                                         | .944        | .909            |
| 15.450                                                         | .944        | .905            |
| 15.535                                                         | .944        | .903            |
| 15.935                                                         | .944        | .901            |
| 16.400                                                         | .944        | .899            |
| 16.550                                                         | .944        | .897            |

|               |             |             |
|---------------|-------------|-------------|
| 16.650        | .944        | .895        |
| 16.900        | .944        | .893        |
| 17.150        | .944        | .891        |
| 17.250        | .944        | .889        |
| 17.405        | .944        | .887        |
| 17.555        | .944        | .885        |
| 17.800        | .944        | .883        |
| 18.005        | .917        | .883        |
| 18.055        | .917        | .882        |
| 18.150        | .917        | .880        |
| 18.550        | .917        | .878        |
| 19.000        | .917        | .876        |
| 19.200        | .917        | .874        |
| 19.590        | .917        | .872        |
| <u>19.940</u> | <u>.917</u> | <u>.870</u> |
| <u>20.050</u> | <u>.889</u> | <u>.870</u> |
| 20.250        | .889        | .866        |
| 20.750        | .889        | .864        |
| 21.105        | .889        | .862        |
| 21.155        | .889        | .860        |
| 21.250        | .889        | .858        |
| 21.350        | .889        | .856        |
| 21.450        | .889        | .854        |
| 21.900        | .889        | .847        |
| 22.350        | .889        | .845        |
| 22.450        | .889        | .843        |
| 22.800        | .889        | .841        |
| 23.200        | .889        | .837        |
| 23.350        | .889        | .835        |
| 23.750        | .889        | .833        |
| 24.200        | .889        | .831        |
| 24.700        | .889        | .827        |
| 25.200        | .889        | .825        |
| 25.350        | .889        | .821        |
| 25.490        | .889        | .819        |
| 25.590        | .889        | .817        |
| 25.650        | .889        | .816        |
| 25.740        | .889        | .814        |
| 25.890        | .861        | .814        |
| 26.050        | .833        | .814        |
| 26.200        | .833        | .812        |
| 26.330        | .833        | .808        |
| 26.380        | .833        | .806        |
| 26.450        | .833        | .804        |
| 26.800        | .833        | .802        |
| 27.100        | .806        | .802        |
| 27.150        | .806        | .800        |

|        |      |      |
|--------|------|------|
| 27.250 | .806 | .798 |
| 27.350 | .806 | .796 |
| 27.550 | .778 | .794 |
| 27.850 | .778 | .792 |
| 28.050 | .778 | .790 |
| 28.150 | .778 | .786 |
| 28.350 | .778 | .784 |
| 28.800 | .778 | .783 |
| 29.150 | .778 | .777 |
| 29.250 | .778 | .775 |
| 29.305 | .778 | .773 |
| 29.405 | .778 | .771 |
| 29.955 | .778 | .769 |
| 30.455 | .778 | .767 |
| 30.850 | .778 | .765 |
| 31.485 | .778 | .763 |
| 31.935 | .778 | .761 |
| 32.150 | .778 | .759 |
| 32.250 | .778 | .757 |
| 32.400 | .778 | .755 |
| 32.550 | .750 | .753 |
| 32.900 | .750 | .751 |
| 33.700 | .750 | .750 |
| 34.250 | .722 | .748 |
| 34.400 | .722 | .744 |
| 34.800 | .722 | .742 |
| 35.150 | .694 | .740 |
| 35.250 | .694 | .734 |
| 35.350 | .694 | .732 |
| 35.850 | .694 | .728 |
| 36.500 | .694 | .724 |
| 37.100 | .694 | .722 |
| 37.850 | .694 | .720 |
| 38.250 | .694 | .709 |
| 38.350 | .694 | .707 |
| 38.450 | .694 | .705 |
| 38.685 | .694 | .703 |
| 39.035 | .694 | .701 |
| 39.300 | .694 | .697 |
| 39.450 | .694 | .695 |
| 40.850 | .694 | .693 |
| 42.250 | .694 | .691 |
| 42.700 | .667 | .689 |
| 43.200 | .667 | .687 |
| 43.350 | .667 | .685 |
| 44.300 | .667 | .683 |
| 45.650 | .639 | .682 |



|        |      |      |
|--------|------|------|
| 46.150 | .639 | .680 |
| 46.250 | .639 | .678 |
| 46.450 | .639 | .676 |
| 46.650 | .639 | .674 |
| 46.950 | .639 | .672 |
| 47.250 | .639 | .670 |
| 47.700 | .639 | .668 |
| 48.600 | .639 | .666 |
| 49.200 | .639 | .664 |
| 49.800 | .639 | .662 |
| 50.700 | .639 | .660 |
| 51.580 | .639 | .658 |
| 52.080 | .639 | .656 |
| 52.200 | .639 | .654 |
| 52.650 | .639 | .650 |
| 53.150 | .639 | .649 |
| 53.350 | .639 | .647 |
| 53.450 | .639 | .643 |
| 53.800 | .639 | .641 |
| 54.150 | .639 | .639 |
| 54.350 | .639 | .637 |
| 55.400 | .639 | .635 |
| 56.400 | .639 | .633 |
| 56.600 | .639 | .631 |
| 56.850 | .639 | .629 |
| 57.100 | .639 | .627 |
| 57.300 | .639 | .625 |
| 57.500 | .639 | .623 |
| 57.850 | .639 | .619 |
| 58.550 | .639 | .617 |
| 59.050 | .639 | .616 |
| 59.150 | .639 | .610 |
| 59.300 | .639 | .608 |
| 59.450 | .611 | .608 |
| 60.450 | .611 | .606 |
| 61.700 | .611 | .604 |
| 62.050 | .611 | .602 |
| 62.200 | .611 | .600 |
| 62.700 | .611 | .598 |
| 63.200 | .611 | .596 |
| 63.350 | .611 | .592 |
| 63.450 | .611 | .590 |
| 64.050 | .611 | .588 |
| 64.900 | .611 | .586 |
| 65.250 | .611 | .584 |
| 65.750 | .611 | .583 |
| 66.300 | .611 | .577 |

|        |      |      |
|--------|------|------|
| 66.750 | .611 | .575 |
| 67.150 | .611 | .573 |
| 67.250 | .583 | .567 |
| 67.350 | .583 | .563 |
| 67.450 | .583 | .559 |
| 67.800 | .583 | .557 |
| 68.250 | .556 | .557 |
| 68.550 | .556 | .553 |
| 68.850 | .556 | .551 |
| 69.100 | .556 | .550 |
| 69.300 | .556 | .548 |
| 69.800 | .556 | .544 |
| 70.350 | .556 | .540 |
| 70.900 | .556 | .538 |
| 71.700 | .556 | .536 |
| 72.200 | .556 | .534 |
| 72.450 | .556 | .530 |
| 72.850 | .556 | .528 |
| 73.150 | .556 | .526 |
| 73.250 | .556 | .522 |
| 73.450 | .556 | .520 |
| 74.000 | .556 | .518 |
| 74.450 | .556 | .517 |
| 74.750 | .556 | .515 |
| 75.050 | .556 | .513 |
| 75.200 | .556 | .511 |
| 75.350 | .556 | .507 |
| 75.450 | .556 | .503 |
| 76.000 | .556 | .501 |
| 76.850 | .556 | .497 |
| 77.250 | .528 | .497 |
| 77.750 | .528 | .495 |
| 78.250 | .500 | .495 |
| 78.350 | .500 | .491 |
| 78.750 | .500 | .485 |
| 79.200 | .500 | .480 |
| 79.350 | .500 | .478 |
| 79.450 | .500 | .476 |
| 79.800 | .500 | .474 |
| 80.250 | .500 | .472 |
| 80.700 | .500 | .470 |
| 81.250 | .500 | .468 |
| 81.750 | .500 | .466 |
| 82.100 | .500 | .464 |
| 82.250 | .500 | .462 |
| 82.350 | .500 | .458 |
| 82.450 | .500 | .456 |

|         |      |      |
|---------|------|------|
| 82.600  | .500 | .454 |
| 82.900  | .500 | .452 |
| 83.650  | .500 | .450 |
| 84.250  | .500 | .449 |
| 84.350  | .500 | .445 |
| 84.750  | .500 | .443 |
| 85.150  | .500 | .441 |
| 85.700  | .500 | .439 |
| 86.650  | .500 | .437 |
| 87.150  | .500 | .433 |
| 87.250  | .500 | .431 |
| 87.350  | .500 | .429 |
| 87.950  | .500 | .427 |
| 88.750  | .472 | .427 |
| 89.050  | .472 | .425 |
| 89.150  | .472 | .423 |
| 89.350  | .472 | .421 |
| 89.550  | .472 | .417 |
| 89.800  | .472 | .416 |
| 90.100  | .472 | .412 |
| 90.300  | .472 | .410 |
| 90.500  | .472 | .406 |
| 90.850  | .472 | .404 |
| 91.150  | .472 | .402 |
| 91.350  | .472 | .400 |
| 91.800  | .472 | .398 |
| 92.150  | .472 | .396 |
| 92.250  | .472 | .394 |
| 92.700  | .472 | .390 |
| 93.150  | .472 | .388 |
| 93.600  | .472 | .384 |
| 94.100  | .472 | .383 |
| 94.300  | .472 | .381 |
| 94.850  | .472 | .379 |
| 95.350  | .472 | .377 |
| 95.800  | .472 | .375 |
| 96.350  | .472 | .373 |
| 96.550  | .472 | .371 |
| 96.950  | .472 | .369 |
| 97.500  | .444 | .363 |
| 98.000  | .417 | .363 |
| 98.350  | .417 | .361 |
| 98.450  | .417 | .357 |
| 98.750  | .417 | .355 |
| 99.100  | .417 | .353 |
| 99.300  | .417 | .348 |
| 100.350 | .417 | .346 |

|         |      |      |
|---------|------|------|
| 101.750 | .417 | .344 |
| 102.350 | .417 | .340 |
| 102.900 | .417 | .338 |
| 104.250 | .417 | .336 |
| 105.250 | .389 | .336 |
| 105.450 | .389 | .334 |
| 105.700 | .389 | .332 |
| 106.550 | .389 | .330 |
| 107.350 | .389 | .328 |
| 107.500 | .361 | .328 |
| 107.850 | .361 | .326 |
| 108.250 | .361 | .324 |
| 108.750 | .361 | .322 |
| 109.250 | .361 | .317 |
| 109.950 | .361 | .315 |
| 110.800 | .361 | .313 |
| 111.600 | .361 | .311 |
| 112.200 | .361 | .309 |
| 112.350 | .361 | .307 |
| 113.450 | .361 | .305 |
| 114.800 | .361 | .303 |
| 115.250 | .361 | .301 |
| 116.350 | .361 | .299 |
| 117.350 | .361 | .297 |
| 117.450 | .361 | .295 |
| 117.600 | .361 | .293 |
| 119.255 | .361 | .291 |
| 121.055 | .361 | .289 |
| 121.350 | .361 | .283 |
| 121.800 | .361 | .282 |
| 122.300 | .361 | .280 |
| 122.450 | .361 | .278 |
| 122.950 | .361 | .276 |
| 123.850 | .361 | .274 |
| 124.450 | .361 | .272 |
| 124.950 | .361 | .270 |
| 125.350 | .361 | .268 |
| 125.450 | .361 | .266 |
| 125.590 | .361 | .264 |
| 125.690 | .361 | .262 |
| 125.900 | .361 | .260 |
| 126.150 | .361 | .258 |
| 126.800 | .361 | .256 |
| 127.900 | .361 | .252 |
| 128.450 | .333 | .252 |
| 128.750 | .333 | .250 |
| 129.050 | .333 | .249 |

|         |      |      |
|---------|------|------|
| 129.150 | .333 | .245 |
| 129.850 | .333 | .243 |
| 130.950 | .306 | .243 |
| 131.950 | .306 | .241 |
| 132.900 | .306 | .239 |
| 134.400 | .306 | .237 |
| 135.950 | .306 | .235 |
| 137.400 | .306 | .233 |
| 138.700 | .306 | .231 |
| 139.050 | .278 | .231 |
| 139.150 | .278 | .229 |
| 139.300 | .278 | .227 |
| 140.300 | .278 | .225 |
| 141.800 | .278 | .223 |
| 142.500 | .278 | .219 |
| 143.150 | .278 | .217 |
| 144.950 | .278 | .216 |
| 147.250 | .250 | .216 |
| 148.650 | .222 | .216 |
| 149.100 | .222 | .214 |
| 149.750 | .222 | .210 |
| 151.150 | .222 | .208 |
| 152.100 | .222 | .206 |
| 152.350 | .222 | .204 |
| 152.900 | .222 | .202 |
| 153.700 | .222 | .200 |
| 154.250 | .222 | .198 |
| 154.700 | .222 | .196 |
| 155.150 | .222 | .194 |
| 155.650 | .222 | .192 |
| 156.050 | .222 | .190 |
| 156.150 | .222 | .188 |
| 157.800 | .222 | .186 |
| 159.800 | .222 | .184 |
| 160.650 | .222 | .183 |
| 161.800 | .222 | .181 |
| 162.900 | .222 | .179 |
| 163.750 | .222 | .177 |
| 165.700 | .222 | .173 |
| 167.850 | .222 | .171 |
| 169.350 | .222 | .169 |
| 170.700 | .222 | .167 |
| 172.200 | .222 | .165 |
| 174.350 | .222 | .163 |
| 175.550 | .222 | .161 |
| 176.500 | .222 | .159 |
| 177.700 | .222 | .157 |

|         |      |      |
|---------|------|------|
| 178.350 | .222 | .155 |
| 178.900 | .222 | .153 |
| 179.200 | .222 | .151 |
| 179.750 | .222 | .148 |
| 180.300 | .222 | .146 |
| 180.850 | .222 | .144 |
| 181.750 | .222 | .142 |
| 182.250 | .222 | .140 |
| 182.650 | .222 | .138 |
| 183.050 | .222 | .136 |
| 183.150 | .222 | .134 |
| 183.750 | .222 | .132 |
| 184.350 | .222 | .130 |
| 184.450 | .222 | .128 |
| 184.750 | .222 | .126 |
| 185.650 | .222 | .124 |
| 186.650 | .222 | .122 |
| 187.100 | .222 | .120 |
| 188.150 | .222 | .118 |
| 189.250 | .222 | .117 |
| 191.300 | .222 | .115 |
| 193.250 | .222 | .113 |
| 193.400 | .222 | .111 |
| 194.950 | .222 | .109 |
| 197.000 | .222 | .107 |
| 197.950 | .222 | .105 |
| 198.650 | .222 | .103 |
| 199.050 | .222 | .101 |
| 200.150 | .222 | .099 |
| 201.600 | .222 | .097 |
| 202.500 | .222 | .095 |
| 203.550 | .222 | .093 |
| 204.350 | .222 | .091 |
| 205.950 | .222 | .089 |
| 207.700 | .222 | .087 |
| 208.250 | .222 | .085 |
| 208.450 | .222 | .083 |
| 208.850 | .194 | .083 |
| 209.250 | .194 | .082 |
| 209.400 | .194 | .080 |
| 211.400 | .194 | .078 |
| 213.650 | .194 | .076 |
| 214.200 | .194 | .074 |
| 214.750 | .194 | .072 |
| 215.300 | .194 | .070 |
| 216.450 | .194 | .068 |
| 219.350 | .194 | .066 |

|          |      |      |
|----------|------|------|
| 221.350  | .194 | .064 |
| 223.200  | .194 | .062 |
| 225.600  | .194 | .060 |
| 226.750  | .194 | .058 |
| 227.400  | .194 | .056 |
| 229.250  | .194 | .054 |
| 231.100  | .194 | .052 |
| 231.250  | .194 | .050 |
| 231.350  | .194 | .049 |
| 232.300  | .194 | .047 |
| 234.300  | .194 | .045 |
| 236.350  | .194 | .043 |
| 239.200  | .194 | .041 |
| 241.700  | .194 | .039 |
| 242.750  | .194 | .037 |
| 245.450  | .194 | .035 |
| 248.450  | .194 | .033 |
| 251.400  | .194 | .031 |
| 253.900  | .167 | .031 |
| 256.750  | .167 | .029 |
| 259.800  | .167 | .027 |
| 260.850  | .167 | .025 |
| 262.900  | .167 | .023 |
| 265.700  | .139 | .023 |
| 267.150  | .139 | .021 |
| 268.800  | .111 | .021 |
| 270.400  | .111 | .019 |
| 272.500  | .111 | .017 |
| 283.400  | .111 | .016 |
| 294.250  | .111 | .014 |
| 298.700  | .083 | .014 |
| 301.750  | .056 | .014 |
| 302.350  | .056 | .012 |
| 307.550  | .056 | .010 |
| 317.000  | .056 | .008 |
| 330.250  | .056 | .006 |
| 340.800  | .056 | .004 |
| 353.400  | .056 | .002 |
| 394.800  | .028 | .002 |
| 818.200  | .000 | .002 |
| 1212.200 | .000 | .000 |

---
